# Supplementary material
Source: publisher site journal article supplement (https://www.dovepress.com/article/360274)
Supplement: Supplementary file 1 [file get_supplementary_file.php]

| Question                                                                                   | Answer                                                                                                                                                                                                                    |
|--------------------------------------------------------------------------------------------|---------------------------------------------------------------------------------------------------------------------------------------------------------------------------------------------------------------------------|
| <b>◆ 【Demographic characteristics】</b>                                                     |                                                                                                                                                                                                                           |
| 1. Age (years)                                                                             | <input type="checkbox"/> 18-19 <input type="checkbox"/> 20-21 <input type="checkbox"/> 22-23                                                                                                                              |
| 2. Gender                                                                                  | <input type="checkbox"/> Male <input type="checkbox"/> Female                                                                                                                                                             |
| 3. Ethnicity                                                                               | <input type="checkbox"/> The Han group <input type="checkbox"/> The minority ethnic group                                                                                                                                 |
| 4. Region of residence                                                                     | <input type="checkbox"/> Rural <input type="checkbox"/> Urban                                                                                                                                                             |
| 5. College major                                                                           | <input type="checkbox"/> Medicine <input type="checkbox"/> Non-medicine                                                                                                                                                   |
| 6. Grade level                                                                             | <input type="checkbox"/> Junior grade <input type="checkbox"/> Middle grade <input type="checkbox"/> Senior grade                                                                                                         |
| 7. University location                                                                     | <input type="checkbox"/> Less developed regions<br><input type="checkbox"/> Developing regions<br><input type="checkbox"/> Developed regions                                                                              |
| 8. Relatives with medical background                                                       | <input type="checkbox"/> No<br><input type="checkbox"/> Non-immediate relatives<br><input type="checkbox"/> Immediate relatives                                                                                           |
| <b>◆ 【The awareness of the COVID-19 vaccine】</b>                                           |                                                                                                                                                                                                                           |
| 1. How well you know about the information about the current state-approved vaccines?      | <input type="checkbox"/> Totally <input type="checkbox"/> Mostly <input type="checkbox"/> A little <input type="checkbox"/> Not at all                                                                                    |
| 2. Which of the following groups do you think are contraindicated to COVID-19 vaccination? | <input type="checkbox"/> Patients with immunodeficiencies<br><input type="checkbox"/> Patients with severe chronic diseases<br><input type="checkbox"/> Pregnant women<br><input type="checkbox"/> Patients with epilepsy |
| <b>◆ 【The acceptance of the COVID-19 vaccine】</b>                                          |                                                                                                                                                                                                                           |

|                                                                                                           |                                                                                                                                                                                                                                                                              |
|-----------------------------------------------------------------------------------------------------------|------------------------------------------------------------------------------------------------------------------------------------------------------------------------------------------------------------------------------------------------------------------------------|
| 1. Are you willing to accept the COVID-19 vaccine?                                                        | <input type="checkbox"/> Willing<br><input type="checkbox"/> Unwilling before but willing now<br><input type="checkbox"/> Unwilling                                                                                                                                          |
| ◆ <b>【Relevant factors about the awareness and acceptance of the COVID-19 vaccine】</b>                    |                                                                                                                                                                                                                                                                              |
| 1. Are you satisfied with the current state of pandemic control?                                          | <input type="checkbox"/> Yes <input type="checkbox"/> No                                                                                                                                                                                                                     |
| 2. Do you think the COVID-19 pandemic will rebound?                                                       | <input type="checkbox"/> Yes <input type="checkbox"/> No                                                                                                                                                                                                                     |
| 3. Do you know any side-effects of the current COVID-19 vaccines?                                         | <input type="checkbox"/> Yes <input type="checkbox"/> No                                                                                                                                                                                                                     |
| 4. Do you think “whether to vaccinate” will affect how others’ evaluation of you?                         | <input type="checkbox"/> Unaffected<br><input type="checkbox"/> Moderately affected<br><input type="checkbox"/> Completely affected                                                                                                                                          |
| 5. Whether there were relatives involved in the fight against COVID-19?                                   | <input type="checkbox"/> Yes <input type="checkbox"/> No                                                                                                                                                                                                                     |
| 6. Which channel do you prefer to get vaccinated?                                                         | <input type="checkbox"/> Community and others <input type="checkbox"/> School <input type="checkbox"/> Hospital                                                                                                                                                              |
| 7. Which source do you trust more to obtain COVID-19 information?                                         | <input type="checkbox"/> Government <input type="checkbox"/> News<br><input type="checkbox"/> WeChat <input type="checkbox"/> Authoritative media<br><input type="checkbox"/> School <input type="checkbox"/> Relatives and friends<br><input type="checkbox"/> Others _____ |
| 8. If there is a charge for vaccination, what is the range of charge you can accept for vaccines?         | <input type="checkbox"/> Free <input type="checkbox"/> ≤ 200 RMB<br><input type="checkbox"/> 201- 400 RMB <input type="checkbox"/> > 400 RMB                                                                                                                                 |
| 9. Are you concerned about the differences of vaccine manufacturers between different vaccine injections? | <input type="checkbox"/> Yes <input type="checkbox"/> No <input type="checkbox"/> Neutral                                                                                                                                                                                    |
| 10. How often do you currently wear mask?                                                                 | <input type="checkbox"/> Not or occasionally<br><input type="checkbox"/> Public only<br><input type="checkbox"/> Frequently<br><input type="checkbox"/> All the time                                                                                                         |

|                                                                                                                                                                                                                                                                                                    |                                                                                                                                                                                                           |
|----------------------------------------------------------------------------------------------------------------------------------------------------------------------------------------------------------------------------------------------------------------------------------------------------|-----------------------------------------------------------------------------------------------------------------------------------------------------------------------------------------------------------|
| <b>11. How well do you accept the current state-approved vaccines? (such as HPV-vaccine for girls)</b>                                                                                                                                                                                             | <input type="checkbox"/> Low <input type="checkbox"/> Moderate <input type="checkbox"/> High                                                                                                              |
| <b>◆ 【Mental and psychological characteristics】</b>                                                                                                                                                                                                                                                |                                                                                                                                                                                                           |
| <b>1. Mental state (please select according to your actual situation in the last two weeks; 0 means “Not At All”, 1 means “Several Days”, 2 means “Over Half the Days”, and 3 means “Nearly Every Day”)<br/>Over the last 2 weeks, how often have you been bothered by the following problems?</b> |                                                                                                                                                                                                           |
| 1) Feeling nervous, anxious, or on edge?                                                                                                                                                                                                                                                           | <input type="checkbox"/> 3 <input type="checkbox"/> 2 <input type="checkbox"/> 1 <input type="checkbox"/> 0                                                                                               |
| 2) Not being able to stop or control worrying?                                                                                                                                                                                                                                                     | <input type="checkbox"/> 3 <input type="checkbox"/> 2 <input type="checkbox"/> 1 <input type="checkbox"/> 0                                                                                               |
| 3) Worrying too much about different things?                                                                                                                                                                                                                                                       | <input type="checkbox"/> 3 <input type="checkbox"/> 2 <input type="checkbox"/> 1 <input type="checkbox"/> 0                                                                                               |
| 4) Trouble relaxing?                                                                                                                                                                                                                                                                               | <input type="checkbox"/> 3 <input type="checkbox"/> 2 <input type="checkbox"/> 1 <input type="checkbox"/> 0                                                                                               |
| 5) Being so restless that it’s hard to sit still?                                                                                                                                                                                                                                                  | <input type="checkbox"/> 3 <input type="checkbox"/> 2 <input type="checkbox"/> 1 <input type="checkbox"/> 0                                                                                               |
| 6) Becoming easily annoyed or irritable?                                                                                                                                                                                                                                                           | <input type="checkbox"/> 3 <input type="checkbox"/> 2 <input type="checkbox"/> 1 <input type="checkbox"/> 0                                                                                               |
| 7) Feeling afraid as if something awful might happen?                                                                                                                                                                                                                                              | <input type="checkbox"/> 3 <input type="checkbox"/> 2 <input type="checkbox"/> 1 <input type="checkbox"/> 0                                                                                               |
| <b>2. Sleep status (Please select according to your actual situation in the last month; 0 means “None”, 1 means “Mild”, 2 means “Moderate”, 3 means “Severe”, and 4 means “Very Severe”)</b>                                                                                                       |                                                                                                                                                                                                           |
| 1) Difficulty falling asleep?                                                                                                                                                                                                                                                                      | <input type="checkbox"/> 4 <input type="checkbox"/> 3 <input type="checkbox"/> 2 <input type="checkbox"/> 1 <input type="checkbox"/> 0                                                                    |
| 2) Difficulty maintaining sleep?                                                                                                                                                                                                                                                                   | <input type="checkbox"/> 4 <input type="checkbox"/> 3 <input type="checkbox"/> 2 <input type="checkbox"/> 1 <input type="checkbox"/> 0                                                                    |
| 3) Early awakening?                                                                                                                                                                                                                                                                                | <input type="checkbox"/> 4 <input type="checkbox"/> 3 <input type="checkbox"/> 2 <input type="checkbox"/> 1 <input type="checkbox"/> 0                                                                    |
| 4) How satisfied/dissatisfied are you with your current sleep pattern?                                                                                                                                                                                                                             | <input type="checkbox"/> 4 Very Dissatisfied <input type="checkbox"/> 3 Dissatisfied<br><input type="checkbox"/> 2 Neutral <input type="checkbox"/> 1 Satisfied <input type="checkbox"/> 0 Very Satisfied |

|                                                                                                                   |                                                                                                                                        |
|-------------------------------------------------------------------------------------------------------------------|----------------------------------------------------------------------------------------------------------------------------------------|
| 5) To what extent do you consider your sleep problem to interfere with your daily functioning?                    | <input type="checkbox"/> 4 <input type="checkbox"/> 3 <input type="checkbox"/> 2 <input type="checkbox"/> 1 <input type="checkbox"/> 0 |
| 6) How noticeable to others do you think your sleeping problem is in terms of impairing the quality of your life? | <input type="checkbox"/> 4 <input type="checkbox"/> 3 <input type="checkbox"/> 2 <input type="checkbox"/> 1 <input type="checkbox"/> 0 |
| 7) How worried/distressed are you about your current sleep problem?                                               | <input type="checkbox"/> 4 <input type="checkbox"/> 3 <input type="checkbox"/> 2 <input type="checkbox"/> 1 <input type="checkbox"/> 0 |
